# Supplementary material for: The impact of adhering to a quality indicator for sedation, analgesia, and delirium management on costs, revenues, and clinical outcomes in intensive care in Germany: A retrospective observational study
Source: PubMed Central journal article supplement (PMC11326618; doi:10.1371/journal.pone.0308948), 2024-08-15
Supplement: pone.0308948.s001.pdf [file pone.0308948.s001.pdf]

S1 Figure: Monitoring scheme defining high and low adherence to the quality indicator

| Duration                   | Treatment day (24 hours) |    |         |    |         |    | Comment                 |
|----------------------------|--------------------------|----|---------|----|---------|----|-------------------------|
|                            | Shift 1                  |    | Shift 2 |    | Shift 3 |    |                         |
| Pain score measurement     | yes                      | no | yes     | no | yes     | no | NRS, BPS, VAS           |
| Sedation score measurement | yes                      | no | yes     | no | yes     | no | RASS                    |
| Delirium score measurement | yes                      | no | yes     | no | yes     | no | CAM-ICU, Nu-DESC, ICDSC |

Legend: Full adherence is defined as one measurement per score per shift (a partial ratio of 1/9<sup>th</sup> per measurement) during one treatment day. 1 missing value is considered acceptable also leading into the high adherence group  $8 \times 1/9^{\text{th}} \geq 8/9^{\text{th}}$  (i. e. the goal is to reach 8 or 9 green fields). All remaining patients were considered in the low adherence group ( $< 8/9^{\text{th}}$ ). To define the adherence group (LAG or HAG) the number of measured score values for the complete treatment period was divided by the number of potential score values. NRS = numeric rating scale, BPS = behavioural pain scale, VAS = visual analog scale; RASS = Richmond Agitation Sedation Scale; CAM-ICU = Confusion Assessment Method – Intensive Care Unit, Nu-DESC = Nursing Delirium Detection Scale; ICDSC = Intensive Care Delirium Screening.
