# Supplementary material for: The impact of adhering to a quality indicator for sedation, analgesia, and delirium management on costs, revenues, and clinical outcomes in intensive care in Germany: A retrospective observational study
Source: PubMed Central journal article supplement (PMC11326618; doi:10.1371/journal.pone.0308948), 2024-08-15
Supplement: pone.0308948.s002.pdf [file pone.0308948.s002.pdf]

S2 Fig. Principles of revenue generation in German hospitals

|                         |   |                         |        |                           |   |                  |
|-------------------------|---|-------------------------|--------|---------------------------|---|------------------|
| $\sum$ relative weights | x | Federal state base rate | =      | DRG revenue               |   |                  |
| DRG revenue             | + | Supplementary charges   | +<br>- | Surcharges/<br>Deductions | = | Hospital revenue |
