# Supplementary material for: The impact of adhering to a quality indicator for sedation, analgesia, and delirium management on costs, revenues, and clinical outcomes in intensive care in Germany: A retrospective observational study
Source: PubMed Central journal article supplement (PMC11326618; doi:10.1371/journal.pone.0308948), 2024-08-15

S3 Fig. Development of QI adherence over the studied period

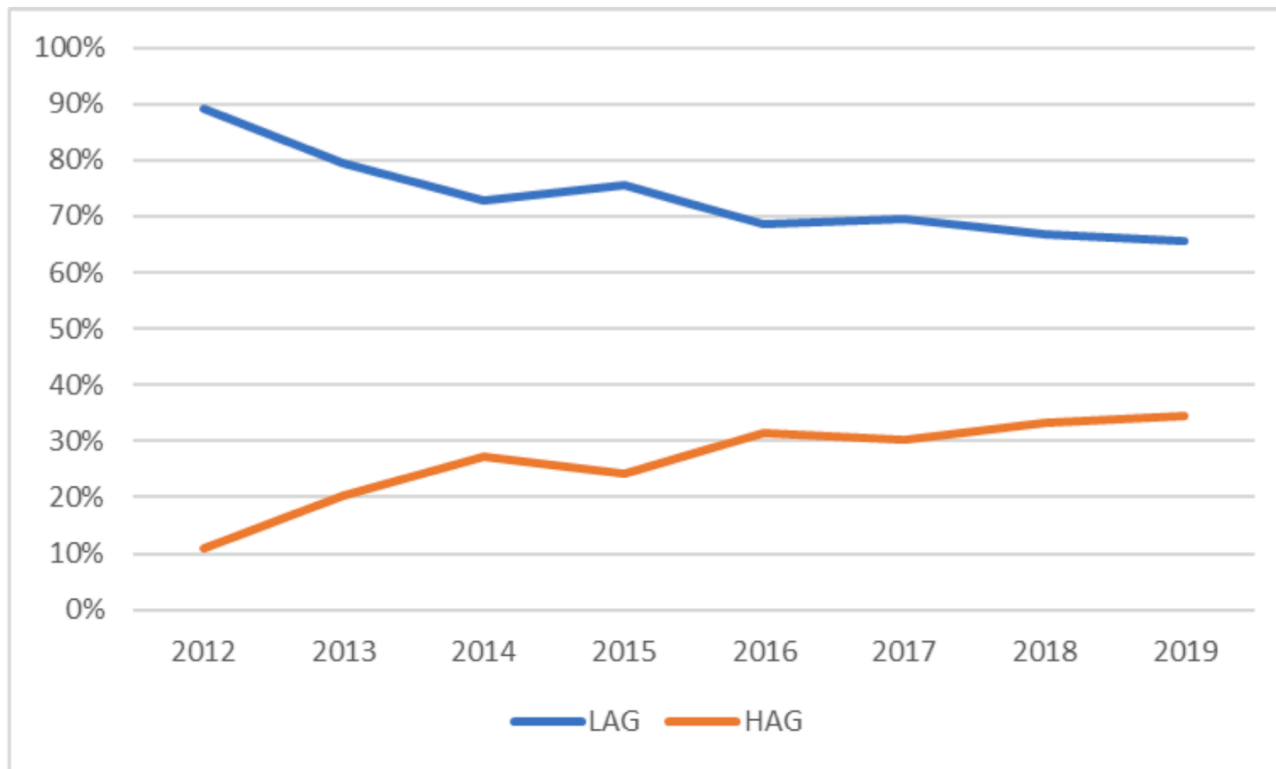

Supplement: pone.0308948.s003.pdf [file pone.0308948.s003.pdf]
