# Supplementary material for: The impact of adhering to a quality indicator for sedation, analgesia, and delirium management on costs, revenues, and clinical outcomes in intensive care in Germany: A retrospective observational study
Source: PubMed Central journal article supplement (PMC11326618; doi:10.1371/journal.pone.0308948), 2024-08-15
Supplement: pone.0308948.s004.pdf [file pone.0308948.s004.pdf]

# S4 Fig. Results for economic outcome following propensity score matching (n=4633)

a) DRG income

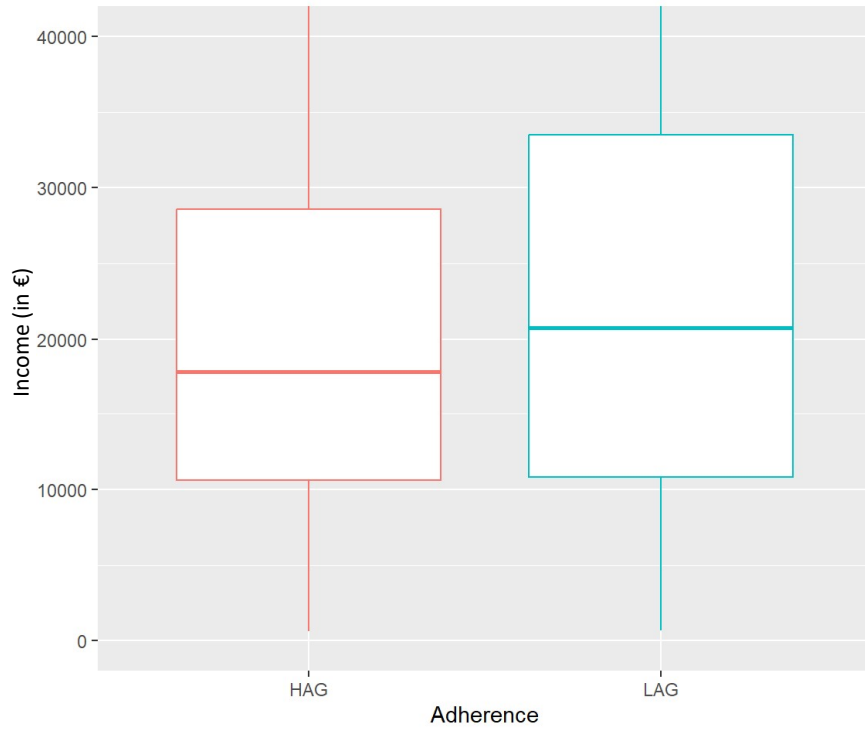

|        | Adherence |         |
|--------|-----------|---------|
|        | HAG       | LAG     |
| Q75    | 28575.0   | 33484.0 |
| Median | 17778.3   | 20750.9 |
| Q25    | 10621.3   | 10810.4 |
| Mean   | 23522.9   | 28363.5 |

b) Overall cost

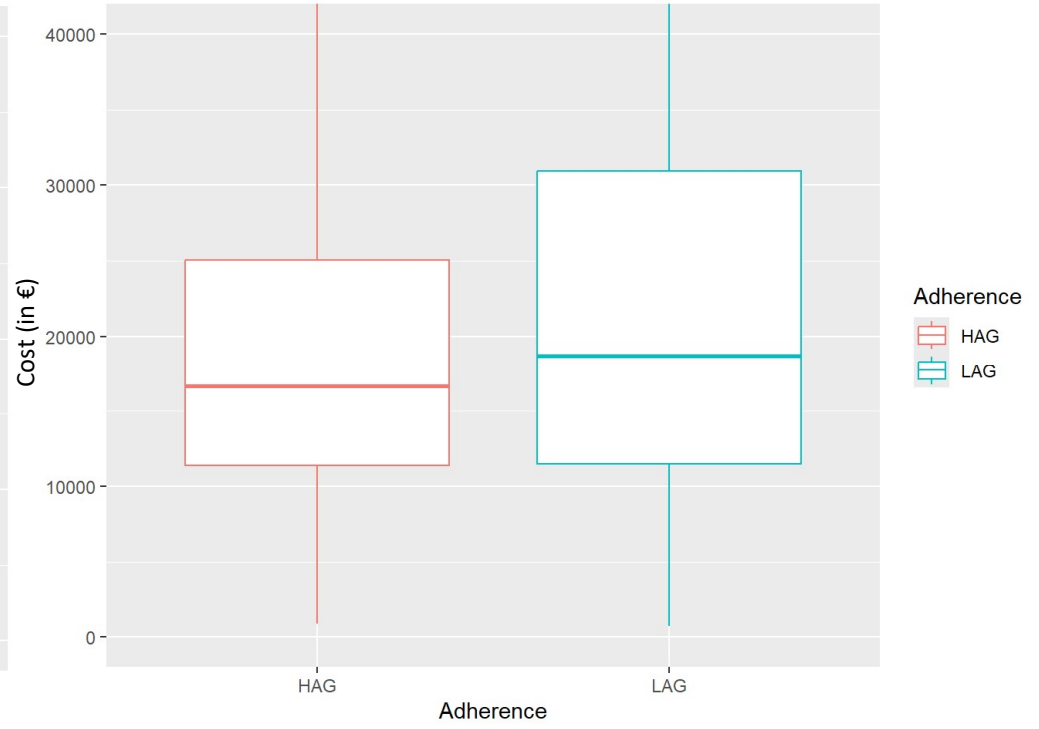

|        | Adherence |         |
|--------|-----------|---------|
|        | HAG       | LAG     |
| Q75    | 25076.1   | 30920.9 |
| Median | 16670.4   | 18696.0 |
| Q25    | 11385.8   | 11493.8 |
| Mean   | 22354.1   | 27281.7 |

Figure legend: Economic data of n=4633 patients following propensity score matching. Data shown as median with IQR. All numerical values in € (Euro). HAG = high adherence group, LAG = low adherence group
