# Supplementary material for: The impact of adhering to a quality indicator for sedation, analgesia, and delirium management on costs, revenues, and clinical outcomes in intensive care in Germany: A retrospective observational study
Source: PubMed Central journal article supplement (PMC11326618; doi:10.1371/journal.pone.0308948), 2024-08-15
Supplement: pone.0308948.s005.pdf [file pone.0308948.s005.pdf]

**S1 Table. Influence factors for high adherence (multiple logistic regression)**

| <i>Predictors</i>                | <b>HAG</b>         |             |
|----------------------------------|--------------------|-------------|
|                                  | <i>Odds Ratios</i> | <i>CI</i>   |
| (Intercept)                      | 0.28               | 0.22 – 0.35 |
| Age                              | 1.00               | 0.99 – 1.00 |
| Male gender                      | 1.11               | 1.03 – 1.19 |
| SAPS-2 on admission              | 1.00               | 1.00 – 1.00 |
| CCI (Age adjusted)               | 0.98               | 0.97 – 0.98 |
| <i>Admission type*</i>           |                    |             |
| Emergency Surgery                | 0.54               | 0.49 – 0.59 |
| Medical                          | 0.43               | 0.40 – 0.47 |
| <i>Main diagnosis category**</i> |                    |             |
| Infection, sepsis                | 0.72               | 0.59 – 0.87 |
| Malignant                        | 0.87               | 0.78 – 0.97 |
| Pulmonary                        | 0.83               | 0.70 – 0.97 |
| Other                            | 0.68               | 0.62 – 0.75 |
| Trauma                           | 0.93               | 0.80 – 1.08 |
| Cerebral                         | 0.76               | 0.69 – 0.85 |
| <i>Treatment year***</i>         |                    |             |
| 2013                             | 1.78               | 1.50 – 2.11 |
| 2014                             | 2.46               | 2.07 – 2.94 |
| 2015                             | 2.06               | 1.74 – 2.45 |
| 2016                             | 3.21               | 2.73 – 3.78 |
| 2017                             | 3.47               | 2.93 – 4.11 |
| 2018                             | 3.67               | 3.12 – 4.33 |
| 2019                             | 3.99               | 3.40 – 4.70 |
| Observations                     | 20220              |             |
| R <sup>2</sup> Tjur              | 0.062              |             |

\*reference: elective surgery; \*\*reference: cardiac; \*\*\*reference: 2012
