# Supplementary material for: The impact of adhering to a quality indicator for sedation, analgesia, and delirium management on costs, revenues, and clinical outcomes in intensive care in Germany: A retrospective observational study
Source: PubMed Central journal article supplement (PMC11326618; doi:10.1371/journal.pone.0308948), 2024-08-15
Supplement: pone.0308948.s006.pdf [file pone.0308948.s006.pdf]

**S2 Table. Influence factors on overall cost (linear regression)**

| <i>Predictors</i>                    | <i>Estimate (€)</i> | <i>Overall cost</i><br><i>CI</i> |
|--------------------------------------|---------------------|----------------------------------|
| (Intercept)                          | 26980.28            | 24449.17 – 29,511.38             |
| High adherence group                 | -4849.28            | -5841.58 – -3856.99              |
| Age                                  | -384.59             | -414.55 – -354.62                |
| Male gender                          | 2530.16             | 1682.42 – 3377.91                |
| SAPS-2 on admission                  | 292.23              | 265.89 – 318.56                  |
| CCI (Age adjusted)                   | 2437.11             | 2327.14 – 2547.07                |
| Admission type*                      |                     |                                  |
| Emergency Surgery                    | 6055.28             | 4815.16 – 7295.40                |
| Medical                              | -996.61             | -2027.97 – 34.74                 |
| Main diagnostic category**           |                     |                                  |
| Infection, sepsis                    | 1910.55             | -317.36 – 4138.45                |
| Malignant                            | -8658.01            | -10087.76 – -7228.25             |
| Pulmonary                            | 7406.20             | 5464.58 – 9347.82                |
| Other                                | 208.20              | -1039.97 – 1456.38               |
| Trauma                               | -4283.46            | -6237.62 – -2329.29              |
| Cerebral                             | -7770.51            | -9090.96 – -6450.05              |
| Observations                         | 20220               |                                  |
| R <sup>2</sup> / R <sup>2</sup> adj. | 0.159 / 0.158       |                                  |

\*reference: elective surgery; \*\*reference: cardiac
