# Supplementary material for: The impact of adhering to a quality indicator for sedation, analgesia, and delirium management on costs, revenues, and clinical outcomes in intensive care in Germany: A retrospective observational study
Source: PubMed Central journal article supplement (PMC11326618; doi:10.1371/journal.pone.0308948), 2024-08-15
Supplement: pone.0308948.s007.pdf [file pone.0308948.s007.pdf]

**S3 Table. Influence factors on length of hospital stay (linear regression)**

| <i>Predictors</i>          | <b>LOS hospital</b>    |               |
|----------------------------|------------------------|---------------|
|                            | <i>Estimate (days)</i> | <i>CI</i>     |
| (Intercept)                | 17.68                  | 16.21 – 19.14 |
| High adherence group       | -1.92                  | -2.49 – -1.35 |
| Age                        | -0.15                  | -0.17 – -0.14 |
| Male gender                | 0.68                   | 0.19 – 1.17   |
| SAPS-2 on admission        | 0.09                   | 0.08 – 0.11   |
| CCI (Age adjusted)         | 1.32                   | 1.26 – 1.38   |
| Admission type*            |                        |               |
| Emergency Surgery          | 1.85                   | 1.13 – 2.57   |
| Medical                    | -0.43                  | -1.03 – 0.17  |
| Main diagnostic category** |                        |               |
| Infection, sepsis          | 6.55                   | 5.27 – 7.84   |
| Malignant                  | 1.65                   | 0.82 – 2.47   |
| Pulmonary                  | 2.48                   | 1.36 – 3.61   |
| Other                      | 4.98                   | 4.26 – 5.70   |
| Trauma                     | 1.41                   | 0.29 – 2.54   |
| Cerebral                   | -2.61                  | -3.37 – -1.84 |
| Observations               | 20220                  |               |
| R <sup>2</sup>             | 0.140                  |               |

\*reference: Elective surgery; \*\*reference: cardiac
