# Supplementary material for: The impact of adhering to a quality indicator for sedation, analgesia, and delirium management on costs, revenues, and clinical outcomes in intensive care in Germany: A retrospective observational study
Source: PubMed Central journal article supplement (PMC11326618; doi:10.1371/journal.pone.0308948), 2024-08-15
Supplement: pone.0308948.s008.pdf [file pone.0308948.s008.pdf]

**S4 Table. Cost items per case in € after propensity score matching (n=4633)**

| Cost item      | HAG                         | LAG                         | p-value |
|----------------|-----------------------------|-----------------------------|---------|
| Personnel      | 8404.98 [5624.86, 12376.96] | 8617.53 [5289.97, 14660.54] | 0.006   |
| Infrastructure | 4167.41 [2786.15, 6329.05]  | 4398.70 [2770.75, 7126.12]  | <0.001  |
| Material       | 3600.39 [2009.52, 6265.97]  | 4174.71 [2162.73, 9158.63]  | <0.001  |
| ICU            | 4512.20 [2210.75, 8681.63]  | 4688.18 [2152.60, 10897.25] | 0.003   |

All values median and interquartile range
