# Supplementary material for: The impact of adhering to a quality indicator for sedation, analgesia, and delirium management on costs, revenues, and clinical outcomes in intensive care in Germany: A retrospective observational study
Source: PubMed Central journal article supplement (PMC11326618; doi:10.1371/journal.pone.0308948), 2024-08-15
Supplement: pone.0308948.s009.pdf [file pone.0308948.s009.pdf]

**S5 Table. Results for economic and clinical outcome following propensity score matching (n=4633)**

a) Comparison of positive and negative revenue margins

|            | <b>Positive or even margin</b> | <b>Negative margin</b> |
|------------|--------------------------------|------------------------|
| <b>HAG</b> | 2413 (52.1)                    | 2220 (47.9)            |
| <b>LAG</b> | 2432 (52.5)                    | 2201 (47.5)            |

Pearson's Chi-squared test with Yates' continuity correction (p=0.7081)

b) Comparison of in-hospital mortality

|            | <b>Died</b> | <b>Survived</b> |
|------------|-------------|-----------------|
| <b>HAG</b> | 404 (8.7)   | 4229 (91.3)     |
| <b>LAG</b> | 534 (11.5)  | 4099 (88.5)     |

Pearson's Chi-squared test with Yates' continuity correction (p=0.009)
