# Supplementary material for: The impact of adhering to a quality indicator for sedation, analgesia, and delirium management on costs, revenues, and clinical outcomes in intensive care in Germany: A retrospective observational study
Source: PubMed Central journal article supplement (PMC11326618; doi:10.1371/journal.pone.0308948), 2024-08-15
Supplement: pone.0308948.s010.pdf [file pone.0308948.s010.pdf]

**S6 Table. Overview over the propensity score matching categories and results. Algorithm used: Nearest neighbour.**

| Parameter                        | Means Treated | Means Control | Std. Mean Diff. | Var. Ratio | eCDF Mean | eCDF Max  | Std. Pair Dist. |
|----------------------------------|---------------|---------------|-----------------|------------|-----------|-----------|-----------------|
| Distance                         | 0.2979910     | 0.2973870     | 0.0058429       | 1.0209578  | 0.0004976 | 0.0123348 | 0.0060044       |
| Age                              | 64.1911194    | 64.0359728    | 0.0103098       | 0.8735489  | 0.0154962 | 0.0337004 | 1.1450945       |
| Female gender                    | 0.3898678     | 0.3914097     | -0.0031613      | NA         | 0.0015419 | 0.0015419 | 0.9253701       |
| Male gender                      | 0.6101322     | 0.6085903     | 0.0031613       | NA         | 0.0015419 | 0.0015419 | 0.9253701       |
| SAPS-2 on admission              | 37.0656388    | 36.8037445    | 0.0152292       | 1.0190569  | 0.0053822 | 0.0255507 | 1.1030705       |
| CCI (Age adjusted)               | 5.4986784     | 5.5006608     | -0.0004568      | 1.0894320  | 0.0057685 | 0.0284141 | 0.9594906       |
| <i>Admission type*</i>           |               |               |                 |            |           |           |                 |
| Emergency Surgery                | 0.5083700     | 0.5044053     | 0.0079306       | NA         | 0.0039648 | 0.0039648 | 0.3471852       |
| Emergency Surgery                | 0.1808370     | 0.1808370     | 0.0000000       | NA         | 0.0000000 | 0.0000000 | 0.2625551       |
| Medical                          | 0.3107930     | 0.3147577     | -0.0085666      | NA         | 0.0039648 | 0.0039648 | 0.5311264       |
| <i>Treatment year***</i>         |               |               |                 |            |           |           |                 |
| 2013                             | 0.1030837     | 0.1019824     | 0.0036220       | NA         | 0.0011013 | 0.0011013 | 0.4643348       |
| 2014                             | 0.1052863     | 0.1046256     | 0.0021530       | NA         | 0.0006608 | 0.0006608 | 0.5590537       |
| 2015                             | 0.1226872     | 0.1246696     | -0.0060424      | NA         | 0.0019824 | 0.0019824 | 0.5807422       |
| 2016                             | 0.1735683     | 0.1762115     | -0.0069789      | NA         | 0.0026432 | 0.0026432 | 0.7211526       |
| 2017                             | 0.1277533     | 0.1246696     | 0.0092378       | NA         | 0.0030837 | 0.0030837 | 0.6479625       |
| 2018                             | 0.1707048     | 0.1740088     | -0.0087813      | NA         | 0.0033040 | 0.0033040 | 0.7265047       |
| 2019                             | 0.1969163     | 0.1938326     | 0.0077544       | NA         | 0.0030837 | 0.0030837 | 0.7056549       |
| <i>Main diagnosis category**</i> |               |               |                 |            |           |           |                 |
| Cardiac                          | 0.3645374     | 0.3658590     | -0.0027459      | NA         | 0.0013216 | 0.0013216 | 0.7221628       |
| Infection, sepsis                | 0.0286344     | 0.0266520     | 0.0118864       | NA         | 0.0019824 | 0.0019824 | 0.3077265       |
| Malignant                        | 0.1770925     | 0.1773128     | -0.0005770      | NA         | 0.0002203 | 0.0002203 | 0.7195070       |
| Pulmonary                        | 0.0515419     | 0.0535242     | -0.0089660      | NA         | 0.0019824 | 0.0019824 | 0.4492950       |
| Other                            | 0.1823789     | 0.1788546     | 0.0091264       | NA         | 0.0035242 | 0.0035242 | 0.7072982       |
| Trauma                           | 0.0599119     | 0.0629956     | -0.0129937      | NA         | 0.0030837 | 0.0030837 | 0.4789091       |
| Cerebral                         | 0.1359031     | 0.1348018     | 0.0032138       | NA         | 0.0011013 | 0.0011013 | 0.6305467       |

eCDF = empirical cumulative distribution function
